# Supplementary material for: RNA Viruses in Blechomonas (Trypanosomatidae) and Evolution of Leishmaniavirus
Source: PubMed Central journal article supplement (PMC6191543; doi:10.1128/mbio.01932-18), 2018-10-16

*B. luni* B09-1006 NV 5'

ccccgggggggggagcgguuggguucaguaccggccaaccgcgagugaucgcgggggggccaccuucugccgaaaaguucagcagacuugcaggccuaugccguggucuugguaccgaccuggucuagaaaggcugaucc

```
1      cccccgggggggggagcgguuggguucaguaccggccaaccgcgagugaucgcgggggggggccaccuucugccgaaaaguucagcagacuugca
1      ..... (((((((((... (((((((((.....)))))))))... (((((((((.....)))))))))...)))). (((... (((((((.....)))))))))...
101    ggcc
101    ))) .
```

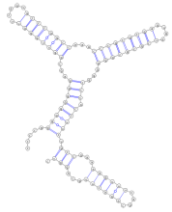

*B. luni* B09-1006 NV 3'

uuccgguuuuucgagagaccuucuccaaauggaauuuggagaccguggaguacggguaguucggucacagugucuucguuuucuguggcccgagcaggagacuaacuggcguuagccuagga  
ggggggcuccccccuccgcuaccuacggg

```
1      aguacggguaguucggucacagugucuucguuuucuguggcccgagcaggagacuaacuggcguuagccuagggggggcuccccccuccgcuaccu
1      ..... (((((((((((((((((((.....)))))))))...)))). (((... (((((.[.])))))]... (((((((((.....)))))))))...)))))
101    acggg
101    .....
```

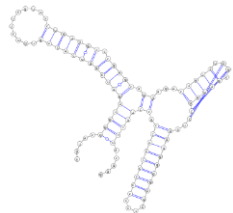

*B. wendyibsoni* B09-1267 NV 5'

ccggaggaggaggagcggucgggcuaacacccccggcuguagguccauggagaaacuccauggaccgagcccacuguguuccgaaaagaauucgccaacuugcaggccuugccguggucuuaguau  
ccggccua

```
1      ccggaggaggaggagcggucgggcuaacacccccggcuguagguccauggagaaacuccauggaccgagcccacuguguuccgaaaagaauucgccaacuug
1      ... ((..... (((... (((((((.....))))))))) .. (((((((((((.....))))))))) ..)) . (((((((((((.....))))))))) ..)
101    caggccu
101    ))).)).
```

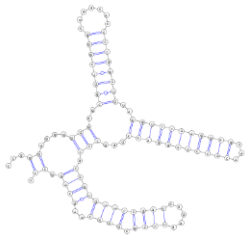

*B. wendyibsoni* B09-1267 NV 3'

cuggaguagagguaauccaggucgagugucuucguuucugcaaccugggaggggacugacaggcgucagcccaggcaugggccccccaugccgccuacccucggg

```
1      cuggaguagagguaauccaggucgagugucuucguuucugcaaccugggaggggacugacaggcgucagcccaggcaugggccccccaugccgccuacccu
1      ..... (((((((.....)))))) .)) .))))) ... (((.....)))))) . (((((((.....))))))))) .....
101    ccucggg
101    .....
```

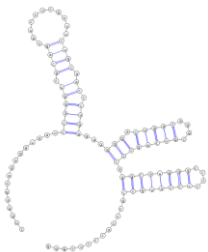

*B. maslovi* B05-J13 NV 5'

ccggaagggggagaggggucaaaauuggucguggagagcgcugucccgacuacucgcccgaauucguuuucguucggggcgcuuuguuuucuuuuuaucau

1 cccgaagggggagaggggucaaaauuggucguggagagcgcugucccgacuacucgcccgaauucguuuucguucggggcgcuuuguuuucuuuuuaucau  
 1 ..... ((. [[ [ ..... ((( (. (( ..... ))) ) ) ) ) ) ) ) ..... ((( ( ( ( ( ..... ))) ) ) ) ) ) ] ] ] .....

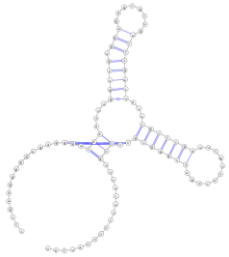

*B. maslovi* B05-J13 NV 3'

cgggcgaaaaaucgagagggaucgccgguaucaaugaagaaaaaguuucaaggagucgguuccgaccucguugaugaggcuuuacuagaggguuuuggccucuccaccggcgauacggugaaacguuacguuuacuaccgggcuuguc **cggg**uuagucg

1 caaggagucgguuccgaccucguugaugaggcuuuacuagaggguuuuggccucuccaccggcgauacggugaaacguuacguuuacuaccgggcuugu  
 1 ... ((( (. [ [ ( (. ] ) ( ( ( ( ( ..... [ [ ..... ))) ) ) ) ) ) ) ) ) ) ) ) . ( ( ( ( ( ..... ( ( ( ( ( ( ( ( ..... ))) ) ) ) ) ) ) ) ) ) .  
 101 **cggg**uagucg  
 101 ) ) ) ) .....

Note: The stop codon of RDRP ORF is downstream of predicted complementary terminal sequence

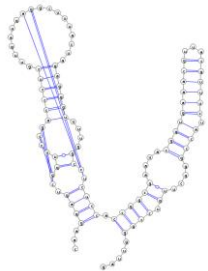

Supplement: mbo005184111sf1.pdf [file mbo005184111sf1.pdf]
