# Supplementary material for: RNA Viruses in Blechomonas (Trypanosomatidae) and Evolution of Leishmaniavirus
Source: PubMed Central journal article supplement (PMC6191543; doi:10.1128/mbio.01932-18), 2018-10-16

## A

### *Blechomonas juanalfonzi* B07-161 LRV1 frameshift

Capsid L S G T E T V V I E G G S -  
cugaguggaacugaaacuguggucauu**gaagggggccu**cu**uaa**gacuauccuagccgggggaugagga  
RDRP - V E L K L W S L K G A L K T I L A G D E

#### Model of compact H-type pseudoknot

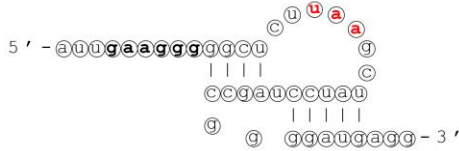

#### Model of +1 frameshift

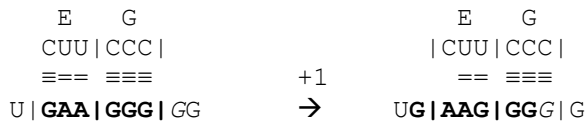

#### Pseudoknot predicted by Ipknot software

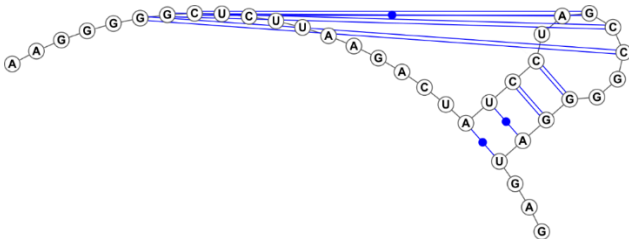

#### Pseudoknot predicted by Kinefold software

ble\_64681 Generated by KineFold

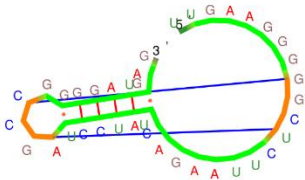

Structure 1. Free-energy :-10.4 kcal/mol

### *B. maslovi* B05-J13 LRV1 frameshift

capsid S D D N T T E T -  
uaagug**aug**acaacacgac**agaaacu**uaaaacucuguuagacaauugu  
- V **M** T T R Q K L K T L L D I

### *B. wendygibsoni* B09-1267 LRV1 frameshift

capsid G R G A V M E P D T E V P A P S A D -  
ggugcgcggugcaguaauggaaccugacacugagguccagcaccaaugugcugau**uga**caugccuauuuuu**aaaggcuqucc**  
- W N L T L R F Q H Q V L I D M P I L K A V

**B**

***Blechomonas juanalfonzi* B07-161 LRV1 3' terminus**

CAUCACCGUUGCGGCCACUAUUCAUAGUGGCCGCACCCGCUAGGACUUCAGCAACUCCUGGCAGACCGGUCCACCUA**UAA**CCUGGUAAUACAGCAAUAUAGGUUUUAUGCGUAGCUGACGCAUACAGUAGGCCCG

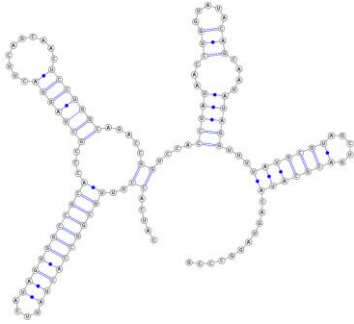

***B. maslovi* B05-J13 LRV1 3' terminus**

AUCAUUAAGUCCUAAACAAUAUUUACGUU**UAG**GCAUAGGCACAAAGUGCCGGAGUGCGAAAGCCG

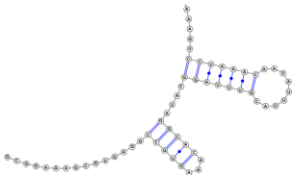

***B. wendygibsoni* B09-1267 LRV1 3' terminus**

CUGAGAUUAAAUAUUGUGCUAUUGAUGGUGCACUACCUUAUAGUGAUGCGUGUAUGUUAGCGCGUCGUUUACCAUGUAAUG  
GUGCGCUUAUCACUGUAAGACAUAUAUAUAUACA**UAA**CAAUUAGACACCGAAUGGUGUCGAUGUGAUUAU

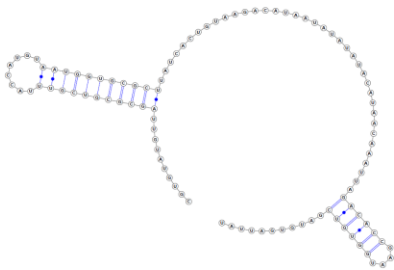

***Leishmaia* LRV1-4 3' terminus**

GUGGAGUUGUUAUACAAGUAAUACAUAUAUGUAUAUGUA**UAA**GGACGCACCAUUCGGAAUAUGGCAAGAGUGCCAUAAACUAUC

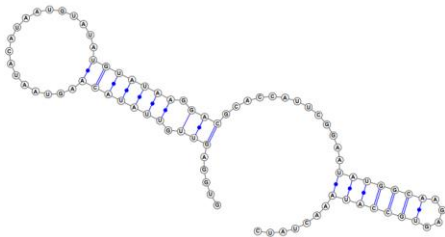

Supplement: mbo005184111sf2.pdf [file mbo005184111sf2.pdf]
